# Supplementary material
Source: MDPI journal article supplement (https://www.mdpi.com/2073-4395/10/7/1037)
Supplement: s1 [file s1]

## Supplementary Materials

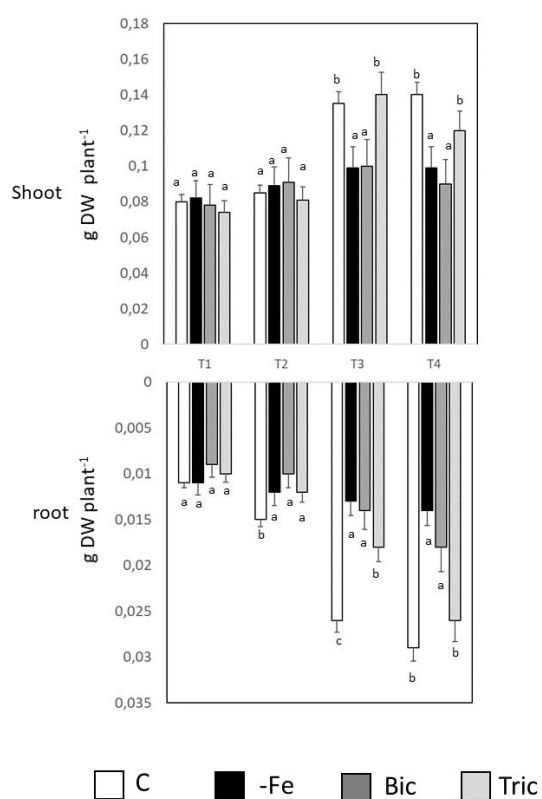

**Figure S1:** Determination of dry weight (DW) of shoots and roots of plants grown in control condition (C), direct Fe deficiency (-Fe) and under induced Fe deficiency in the presence of bicarbonate (Bic) or alkaline organic buffer (Tric). T1, T2, T3 and T4 correspond to sampling at 1, 3, 5 and 7 days. Bars are the  $\pm$ SE (n=9). Different letters indicate statistical differences ( $P<0.05$ ) within each treatment.

**Table S1.** Content of phenolic compounds extracted with methanol in roots ( $\text{mg g}^{-1}\text{FW}$ ) of plants grown in control condition (C), iron deficiency (-Fe), presence of bicarbonate (Bic), alkaline organic buffer (Tric). T1, T2, T3 and T4 correspond to sampling at 1, 3, 5 and 7 days. Values are expressed as the means  $\pm$ SE ( $n=5$ ). Different letters indicate the significant differences ( $P<0.05$ ) within each treatment.

|    | C                  | -Fe               | Bic               | Tric               |
|----|--------------------|-------------------|-------------------|--------------------|
| T1 | 1.13 $\pm$ 0.11 b  | 1.28 $\pm$ 0.12 c | 1.05 $\pm$ 0.12 a | 1.16 $\pm$ 0.08 b  |
| T2 | 1.20 $\pm$ 0.13 ab | 1.13 $\pm$ 0.11 a | 1.50 $\pm$ 0.10 b | 1.22 $\pm$ 0.08 ab |
| T3 | 0.74 $\pm$ 0.06 a  | 1.02 $\pm$ 0.09 b | 1.22 $\pm$ 0.09 c | 1.19 $\pm$ 0.03 c  |
| T4 | 0.60 $\pm$ 0.07 a  | 1.08 $\pm$ 0.01 b | 2.21 $\pm$ 0.13 c | 1.09 $\pm$ 0.09 b  |
